# Supplementary material
Source: PubMed Central journal article supplement (PMC7566387)
Supplement: ofaa401_suppl_supplementary_tables.pdf [file ofaa401_suppl_supplementary_tables.pdf]

**Supplementary Table 1. Distribution of percent of admitted COVID19 patients by race and ethnicity and age.**

| <b>Age group</b> | <b>White</b> | <b>Latinx</b> | <b>African American</b> | <b>p-value (white and Latinx)</b> | <b>P-value (white and African American)</b> | <b>P-value (African American and Latinx)</b> |
|------------------|--------------|---------------|-------------------------|-----------------------------------|---------------------------------------------|----------------------------------------------|
| <b>18-25</b>     | 4%           | 12%           | 4%                      | 0.02                              | 1.0                                         | 0.2                                          |
| <b>26-30</b>     | 3.4%         | 12%           | 11%                     | 0.003                             | 0.04                                        | 1.0                                          |
| <b>31-35</b>     | 9%           | 26%           | 11%                     | 0.0001                            | 0.85                                        | 0.02                                         |
| <b>36-40</b>     | 11%          | 27%           | 17%                     | 0.0025                            | 0.34                                        | 0.13                                         |
| <b>41-45</b>     | 8%           | 40%           | 19%                     | <0.0001                           | 0.05                                        | 0.007                                        |
| <b>46-50</b>     | 11%          | 34%           | 25%                     | <0.0001                           | 0.009                                       | 0.19                                         |
| <b>51-55</b>     | 16%          | 46%           | 28%                     | <0.0001                           | 0.03                                        | 0.02                                         |
| <b>56-60</b>     | 25%          | 46%           | 39%                     | <0.0001                           | 0.03                                        | 0.40                                         |
| <b>61-65</b>     | 33.5%        | 49%           | 44%                     | 0.03                              | 0.16                                        | 0.73                                         |
| <b>66-70</b>     | 35%          | 63%           | 51%                     | 0.0003                            | 0.06                                        | 0.29                                         |
| <b>71-75</b>     | 46%          | 70%           | 45.5%                   | 0.02                              | 1.0                                         | 0.08                                         |
| <b>76-80</b>     | 44%          | 83%           | 63%                     | 0.0002                            | 0.17                                        | 0.21                                         |
| <b>81-85</b>     | 52.5%        | 75%           | 73%                     | 0.03                              | 0.12                                        | 1.0                                          |
| <b>86-90</b>     | 54%          | 80%           | 64%                     | 0.21                              | 0.78                                        | 0.72                                         |
| <b>&gt;90</b>    | 42%          | 100%          | 40%                     | 0.04                              | 1.0                                         | 0.17                                         |

**Supplementary Table 2. Characteristics of all COVID-19 positive patients in the Mass General Brigham healthcare system by race and ethnicity.**

|                                | White (2404)       |                         | Latinx (1309)      |                        | African American (719) |                        | Asian American (177) |                        |
|--------------------------------|--------------------|-------------------------|--------------------|------------------------|------------------------|------------------------|----------------------|------------------------|
|                                | Hospitalized (620) | Not hospitalized (1784) | Hospitalized (470) | Not hospitalized (839) | Hospitalized (209)     | Not hospitalized (510) | Hospitalized (50)    | Not hospitalized (127) |
| <b>Median age (IQR, years)</b> | 72 (60-83)         | 53 (35-66)              | 52 (41-65)         | 40 (29-51)             | 60 (50-70)             | 46 (34-57)             | 61 (46-73)           | 48 (33-58)             |
| <b>Age category</b>            |                    |                         |                    |                        |                        |                        |                      |                        |
| 18-40 years                    | 39 (6%)            | 553 (31%)               | 106 (22%)          | 434 (52%)              | 28 (13%)               | 203 (40%)              | 7 (14%)              | 51 (40%)               |
| 41-60 years                    | 124 (20%)          | 623 (35%)               | 214 (46%)          | 322 (38%)              | 79 (38%)               | 211 (41%)              | 18 (36%)             | 53 (42%)               |
| >60 years                      | 457 (74%)          | 608 (34%)               | 150 (32%)          | 83 (10%)               | 102 (49%)              | 96 (19%)               | 25 (50%)             | 23 (18%)               |
| Male Gender                    | 343 (55%)          | 739 (41%)               | 265 (56%)          | 365 (43.5%)            | 111 (53%)              | 190 (37%)              | 31 (62%)             | 57 (45%)               |
| <b>Comorbidities</b>           |                    |                         |                    |                        |                        |                        |                      |                        |
| <b>BMI*</b>                    |                    |                         |                    |                        |                        |                        |                      |                        |
| <=30                           | 373 (60%)          | 556 (31%)               | 219 (47%)          | 231 (27.5%)            | 116 (55%)              | 121 (24%)              | 38 (76%)             | 57 (45%)               |
| 30-40                          | 193 (31%)          | 297 (16.6%)             | 194 (41%)          | 155 (18.5%)            | 70 (33%)               | 118 (23%)              | 9 (18%)              | 10 (8%)                |
| >40                            | 47 (8%)            | 931 (52%)               | 37 (8%)            | 453 (54%)              | 17 (9%)                | 271 (53%)              | 0 (0%)               | 60 (47%)               |
| <b>Smoking status**</b>        |                    |                         |                    |                        |                        |                        |                      |                        |
| Current                        | 32 (5%)            | 86 (5%)                 | 16 (3%)            | 25 (3%)                | 13 (6%)                | 22 (4%)                | 1 (2%)               | 5 (4%)                 |
| Former                         | 273 (44%)          | 435 (24%)               | 76 (16%)           | 107 (13%)              | 57 (27%)               | 46 (9%)                | 10 (20%)             | 13 (10%)               |
| Never                          | 280 (45%)          | 1039 (58%)              | 308 (66%)          | 593 (71%)              | 116 (56%)              | 339 (66%)              | 33 (66%)             | 92 (72%)               |
| <b>Comorbidities</b>           |                    |                         |                    |                        |                        |                        |                      |                        |
| Diabetes mellitus              | 208 (34%)          | 214 (12%)               | 151 (32%)          | 114 (13.5%)            | 80 (38%)               | 83 (16%)               | 18 (36%)             | 16 (12.6%)             |
| Hyperlipidemia                 | 296 (48%)          | 453 (25%)               | 126 (27%)          | 127 (15%)              | 59 (28%)               | 76 (15%)               | 21 (42%)             | 27 (21%)               |
| Hypertension                   | 363 (59%)          | 533 (30%)               | 159 (34%)          | 137 (16%)              | 115 (55%)              | 145 (28%)              | 26 (52%)             | 27 (21%)               |
| Obstructive lung disease       | 124 (20%)          | 225 (12.6%)             | 49 (10%)           | 92 (11%)               | 32 (15%)               | 57 (11%)               | 8 (16%)              | 4 (3%)                 |
| Interstitial lung disease      | 7 (1%)             | 1 (0.1%)                | 3 (0.6%)           | 1 (0.1%)               | 1 (0.5%)               | 0 (0%)                 | 0 (0%)               | 0 (0%)                 |
| Coronary artery disease        | 98 (16%)           | 82 (4.5%)               | 23 (5%)            | 13 (1.5%)              | 11 (5%)                | 7 (1%)                 | 6 (12%)              | 4 (3%)                 |
| CHF                            | 55 (9%)            | 37 (2%)                 | 10 (2%)            | 5 (0.6%)               | 16 (8%)                | 6 (1%)                 | 2 (4%)               | 0 (0%)                 |
| Cerebrovascular disease        | 42 (7%)            | 44 (2.5%)               | 12 (3%)            | 11 (1%)                | 12 (6%)                | 8 (1.5%)               | 1 (2%)               | 0 (0%)                 |
| Obstructive sleep apnea        | 52 (8%)            | 74 (4%)                 | 11 (2%)            | 23 (3%)                | 11 (5%)                | 7 (1%)                 | 1 (2%)               | 5 (4%)                 |
| CKD                            | 114 (18%)          | 59 (3%)                 | 34 (7%)            | 14 (2%)                | 24 (11%)               | 17 (3%)                | 5 (10%)              | 1 (0.8%)               |
| Transplantation                | 7 (1%)             | 0                       | 8 (2%)             | 0                      | 7 (3%)                 | 0                      | 0 (0%)               | 0 (0%)                 |
| Auto-immune diseases           | 36 (6%)            | 64 (3.5%)               | 15 (3%)            | 16 (2%)                | 8 (4%)                 | 11 (2%)                | 0 (0%)               | 2 (1.6%)               |
| Malignancy                     | 77 (12%)           | 163 (9%)                | 19 (4%)            | 25 (3%)                | 12 (6%)                | 19 (4%)                | 0 (0%)               | 7 (5.5%)               |

|                            |           |           |           |           |          |           |          |          |
|----------------------------|-----------|-----------|-----------|-----------|----------|-----------|----------|----------|
| <b>Total comorbidities</b> |           |           |           |           |          |           |          |          |
| 0                          | 109 (18%) | 830 (47%) | 198 (42%) | 483 (58%) | 55 (26%) | 264 (52%) | 15 (30%) | 78 (61%) |
| 1-2                        | 224 (36%) | 611 (34%) | 151 (32%) | 247 (29%) | 73 (35%) | 171 (33%) | 16 (32%) | 34 (27%) |
| >2                         | 287 (46%) | 343 (19%) | 121 (26%) | 109 (13%) | 81 (39%) | 75 (15%)  | 19 (38%) | 15 (12%) |
| <b>Death</b>               | 140 (23%) | 4 (0.2%)  | 33 (7%)   | 0 (0%)    | 27 (13%) | 3 (0.6%)  | 3 (6%)   | 0 (0%)   |

IQR=Interquartile range, COPD=chronic obstructive pulmonary disease, CHF=congestive heart failure, CKD=chronic kidney disease, ESRD=End stage renal disease

\*missing for 38% of population

\*\*missing for 16% of population

**Supplementary Table 3. Univariable logistic regression model predicting hospital admission among patients with COVID-19 stratified by race**

| Variables                          | White<br>(N=2404)      | Latinx<br>(N=1309)    | African American (N=719) |
|------------------------------------|------------------------|-----------------------|--------------------------|
| <b>Age</b>                         |                        |                       |                          |
| 18-40 years                        | Reference              |                       |                          |
| 41-60 years                        | 2.82 (1.95-4.16) ***   | 2.72 (2.07-3.59) ***  | 2.71 (1.71-4.41) ***     |
| >60 years                          | 10.66 (7.63-15.30) *** | 7.39 (5.28-10.46) *** | 7.70 (4.81-12.68) ***    |
| <b>Gender</b>                      |                        |                       |                          |
| Female                             | Reference              |                       |                          |
| Male                               | 1.75 (1.46-2.11) ***   | 1.68 (1.34-2.11) ***  | 1.91 (1.38-2.65) ***     |
| <b>Smoking status</b>              |                        |                       |                          |
| Never                              | Reference              |                       |                          |
| Current                            | 1.38 (0.89-2.09)       | 1.23 (0.64-2.32)      | 1.73 (0.82-2.50)         |
| Former                             | 2.33 (1.91-2.85) ***   | 1.37 (0.99-1.89)      | 3.62 (2.33-5.65) ***     |
| <b>Last BMI (kg/m<sup>2</sup>)</b> |                        |                       |                          |
| <=30                               | Reference              |                       |                          |
| 30-40                              | 0.97 (0.77-1.21)       | 1.32 (0.99-1.75)      | 0.62 (0.42-0.92) *       |
| >40                                | 1.23 (0.81-1.84)       | 1.12 (0.68-1.84)      | 1.11 (0.55-2.82)         |
| <b>Comorbidities</b>               |                        |                       |                          |
| Diabetes mellitus                  | 3.7 (2.97-4.61) ***    | 3.01 (2.29-3.98) ***  | 3.19 (2.21-4.60) ***     |
| Hyperlipidemia                     | 2.68 (2.22-3.25) ***   | 2.05 (1.55-2.71) ***  | 2.25 (1.52-3.31) ***     |
| Hypertension                       | 3.32 (2.75-4.01) ***   | 2.62 (2.01-3.42) ***  | 3.08 (2.21-4.31) ***     |
| Obstructive lung disease           | 1.73 (1.36-2.20) ***   | 0.95 (0.65-1.36)      | 1.44 (0.89-2.28)         |
| Interstitial lung disease          | 20.36 (3.61-380.9) **  | 5.38 (0.69-108.99)    | 1.9 e+6                  |
| Coronary artery disease            | 3.89 (2.86-5.31) ***   | 3.27 (1.66-6.69) ***  | 3.99 (1.55-10.98) **     |
| CHF                                | 4.59 (3.01-7.09) ***   | 3.63 (1.28-11.70) *   | 6.96 (2.82-19.64) ***    |
| Cerebrovascular disease            | 2.87 (1.86-4.44) ***   | 1.97 (0.86-4.58)      | 3.82 (1.56-9.89) **      |
| Obstructive sleep apnea            | 2.12 (1.46-3.05) ***   | 0.85 (0.40-1.72)      | 3.99 (1.55-10.98) **     |
| CKD                                | 6.59 (4.76-9.21) ***   | 4.59 (2.49-8.93) ***  | 3.76 (1.99-7.27) ***     |
| Transplantation                    | 2.89 (0.90-9.29)       | 5.44 (1.61-24.6) *    | 10.11 (2.51-67.36) **    |
| Auto-immune diseases               | 1.66 (1.08-2.50) *     | 1.69 (0.82-3.48)      | 1.81 (0.68-4.53)         |
| Malignancy                         | 1.41 (1.05-1.87) *     | 1.37 (0.74-2.51)      | 1.57 (0.73-3.27)         |

| <b>Supplementary Table 4. Multivariable logistic regression model predicting hospital admission among patients with COVID-19 adjusted by median household income.</b> |                           |                            |                                     |
|-----------------------------------------------------------------------------------------------------------------------------------------------------------------------|---------------------------|----------------------------|-------------------------------------|
| <b>Variables</b>                                                                                                                                                      | <b>White<br/>(N=2057)</b> | <b>Latinx<br/>(N=1278)</b> | <b>African American<br/>(N=673)</b> |
| <b>Age</b>                                                                                                                                                            |                           |                            |                                     |
| 18-40 years                                                                                                                                                           | Reference                 |                            |                                     |
| 41-60 years                                                                                                                                                           | 2.40 (1.56-3.70) *        | 2.39 (1.78-3.22) *         | 2.23 (1.30-3.82) *                  |
| >60 years                                                                                                                                                             | 7.16 (4.68-10.95) *       | 6.90 (4.49-10.61) *        | 5.99 (3.27-10.98) *                 |
| <b>Gender</b>                                                                                                                                                         |                           |                            |                                     |
| Female                                                                                                                                                                | Reference                 |                            |                                     |
| Male                                                                                                                                                                  | 1.38 (1.10-1.73) *        | 1.68 (1.29-2.19) *         | 1.67 (1.12-2.50) *                  |
| <b>Smoking status</b>                                                                                                                                                 |                           |                            |                                     |
| Never                                                                                                                                                                 | Reference                 |                            |                                     |
| Current                                                                                                                                                               | 1.14 (0.70-1.87)          | 1.18 (0.66-2.12)           | 1.40 (0.63-3.09)                    |
| Former                                                                                                                                                                | 1.25 (0.97-1.61)          | 0.80 (0.55-1.16)           | 2.19 (1.33-3.63) *                  |
| <b>Last BMI (kg/m<sup>2</sup>)</b>                                                                                                                                    |                           |                            |                                     |
| <=30                                                                                                                                                                  | Reference                 |                            |                                     |
| 30-40                                                                                                                                                                 | 0.85 (0.65-1.10)          | 1.48 (1.09-2.01) *         | 1.06 (0.68-1.68)                    |
| >40                                                                                                                                                                   | 1.40 (0.87-2.27)          | 1.64 (0.88-3.06)           | 2.66 (1.15-6.16) *                  |
| <b>Comorbidities</b>                                                                                                                                                  |                           |                            |                                     |
| Diabetes mellitus                                                                                                                                                     | 1.83 (1.35-2.49) *        | 2.64 (1.67-4.16) *         | 1.99 (1.12-3.52) *                  |
| Hyperlipidemia                                                                                                                                                        | 0.87 (0.65-1.18)          | 0.96 (0.60-1.54)           | 0.66 (0.37-1.20)                    |
| Hypertension                                                                                                                                                          | 0.99 (0.72-1.36)          | 1.21 (0.76-1.91)           | 0.69 (0.37-1.28)                    |
| Obstructive lung disease                                                                                                                                              | 1.20 (0.86-1.67)          | 1.06 (0.65-1.73)           | 1.05 (0.55-1.99)                    |
| Interstitial lung disease                                                                                                                                             | 2.76e+6 (2.3e-299-NA)     | 5.79 (0.53-63.41)          | 3.1e+6 (0.000-NA)                   |
| Coronary artery disease                                                                                                                                               | 1.43 (0.97-2.11)          | 1.18 (0.53-2.64)           | 0.67 (0.19-2.43)                    |
| CHF                                                                                                                                                                   | 1.18 (0.71-1.96)          | 1.64 (0.48-5.61)           | 2.23 (0.64-7.78)                    |
| Cerebrovascular disease                                                                                                                                               | 1.24 (0.74-2.09)          | 0.92 (0.35-2.44)           | 1.05 (0.37-3.02)                    |
| Obstructive sleep apnea                                                                                                                                               | 1.20 (0.75-1.91)          | 0.37 (0.14-0.94)           | 2.06 (0.68-6.24)                    |
| CKD                                                                                                                                                                   | 2.65 (1.78-3.95) *        | 1.97 (0.94-4.14)           | 1.47 (0.67-3.24)                    |
| Transplantation                                                                                                                                                       | 0.65 (0.17-2.52)          | 4.34 (0.96-19.76)          | 21.01 (2.31-192.41) *               |
| Auto-immune diseases                                                                                                                                                  | 1.12 (0.68-1.83)          | 1.27 (0.55-2.94)           | 0.91 (0.27-3.09)                    |
| Malignancy                                                                                                                                                            | 0.90 (0.62-1.30)          | 0.97 (0.45-2.08)           | 0.76 (0.29-1.97)                    |
| <b>Total comorbidities</b>                                                                                                                                            |                           |                            |                                     |
| 0                                                                                                                                                                     | Reference                 |                            |                                     |
| 1-2                                                                                                                                                                   | 1.49 (1.02-2.18) *        | 0.91 (0.60-1.37)           | 1.62 (0.85-3.10)                    |
| >2                                                                                                                                                                    | 1.36 (0.71-2.63)          | 0.43 (0.17-1.08)           | 2.34 (0.72-7.59)                    |
| <b>Median household income *</b>                                                                                                                                      |                           |                            |                                     |
| More than 20 <sup>th</sup> percentile                                                                                                                                 | Reference                 |                            |                                     |
| Less than 20 <sup>th</sup> percentile                                                                                                                                 | 1.29 (0.86-1.92)          | 0.89 (0.69-1.15)           | 1.09 (0.72-1.63)                    |

\* Total population with median income = 4711. 20<sup>th</sup> percentile is \$53, 335.



|                            |          |            |            |           |            |            |         |          |
|----------------------------|----------|------------|------------|-----------|------------|------------|---------|----------|
| Auto-immune diseases       | 11 (6%)  | 25 (6%)    | 7 (4%)     | 8 (3%)    | 4 (6%)     | 4 (3%)     | 0 (0%)  | 0 (0%)   |
| Malignancy                 | 21 (11%) | 56 (13%)   | 10 (5.5%)  | 9 (3%)    | 4 (6%)     | 8 (6%)     | 0 (0%)  | 0 (0%)   |
| <b>Total comorbidities</b> |          |            |            |           |            |            |         |          |
| 0                          | 28 (15%) | 81 (18.5%) | 79 (43%)   | 119 (41%) | 17 (25%)   | 38 (27%)   | 1 (8%)  | 14 (37%) |
| 1-2                        | 60 (33%) | 164 (38%)  | 51 (28%)   | 100 (35%) | 23 (34%)   | 50 (35.5%) | 6 (50%) | 10 (26%) |
| >2                         | 96 (52%) | 191 (44%)  | 52 (28.5%) | 69 (24%)  | 28 (41%)   | 53 (37.5%) | 5 (42%) | 14 (37%) |
| <b>Outcome</b>             |          |            |            |           |            |            |         |          |
| Death                      | 60 (33%) | 80 (18%)   | 27 (15%)   | 6 (2%)    | 15 (22%)   | 12 (8.5%)  | 1 (8%)  | 2 (5%)   |
| Discharged to home         | 27 (15%) | 232 (53%)  | 43 (24%)   | 256 (89%) | 14 (20.5%) | 101 (72%)  | 0 (0%)  | 32 (84%) |
| Discharged to SNF          | 15 (8%)  | 67 (15%)   | 6 (3%)     | 13 (4.5%) | 3 (%)      | 12 (8.5%)  | 0 (0%)  | 2 (5%)   |
| Discharged to rehab/STF    | 17 (9%)  | 16 (4%)    | 13 (7%)    | 5 (2%)    | 5 (7%)     | 3 (2%)     | 3 (25%) | 0 (0%)   |
| Still in hospital          | 65 (35%) | 41 (9%)    | 93 (51%)   | 8 (3%)    | 31 (45.5%) | 13 (9%)    | 8 (67%) | 2 (5%)   |

**Supplementary table 6. Multivariable logistic regression model predicting ICU admission among hospitalized patients with COVID-19 adjusted for median household income.**

| <b>Variables</b>                      | <b>White<br/>(N=561)</b> | <b>Latinx<br/>(N=457)</b> | <b>African American<br/>(N=201)</b> |
|---------------------------------------|--------------------------|---------------------------|-------------------------------------|
| <b>Age</b>                            |                          |                           |                                     |
| 18-40 years                           | Reference                |                           |                                     |
| 41-60 years                           | 1.03 (0.39-2.77)         | 1.40 (0.81-2.41)          | 2.76 (0.78-9.72)                    |
| >60 years                             | 1.27 (0.49-3.27)         | 2.67 (1.41-5.06) *        | 5.24 (1.39-19.72) *                 |
| <b>Gender</b>                         |                          |                           |                                     |
| Female                                | Reference                |                           |                                     |
| Male                                  | 1.27 (0.85-1.89)         | 1.41 (0.92-2.15)          | 1.91 (0.92-3.97)                    |
| <b>Smoking status</b>                 |                          |                           |                                     |
| Never                                 | Reference                |                           |                                     |
| Current                               | 1.40 (0.55-3.59)         | 1.82 (0.66-5.01)          | 1.30 (0.32-5.21)                    |
| Former                                | 1.38 (0.90-2.12)         | 1.01 (0.56-1.82)          | 1.85 (0.85-4.02)                    |
| <b>Last BMI (kg/m<sup>2</sup>)</b>    |                          |                           |                                     |
| <=30                                  | Reference                |                           |                                     |
| 30-40                                 | 1.19 (0.78-1.84)         | 1.39 (0.90-2.15)          | 1.51 (0.67-3.41)                    |
| >40                                   | 1.13 (0.54-2.39)         | 3.08 (1.30-7.30) *        | 2.46 (0.63-9.66)                    |
| <b>Comorbidities</b>                  |                          |                           |                                     |
| Diabetes mellitus                     | 1.08 (0.68-1.73)         | 0.73 (0.38-1.40)          | 2.71 (1.04-7.06) *                  |
| Hyperlipidemia                        | 1.00 (0.62-1.63)         | 1.48 (0.73-3.01)          | 0.94 (0.39-2.23)                    |
| Hypertension                          | 0.95 (0.55-1.66)         | 0.82 (0.41-1.61)          | 0.34 (0.12-0.99) *                  |
| Obstructive lung disease              | 1.03 (0.61-1.75)         | 0.31 (0.13-0.73) *        | 0.83 (0.28-2.42)                    |
| Interstitial lung disease             | 0.79 (0.12-5.34)         | 2.12 (0.15-30.47)         | 1.7e+7 (0.000 – NA)                 |
| Coronary artery disease               | 0.49 (0.27-0.88) *       | 0.53 (0.19-1.52)          | 0.60 (0.10-3.48)                    |
| CHF                                   | 1.50 (0.77-2.93)         | 0.90 (0.19-4.27)          | 2.32 (0.57-9.36)                    |
| Cerebrovascular disease               | 0.67 (0.30-1.48)         | 0.36 (0.08-1.57)          | 0.49 (0.11-2.29)                    |
| Obstructive sleep apnea               | 1.58 (0.79-3.16)         | 0.17 (0.03-1.01)          | 0.75 (0.14-4.11)                    |
| CKD                                   | 1.12 (0.67-1.90)         | 0.48 (0.19-1.20)          | 1.47 (0.49-4.45)                    |
| Transplantation                       | 4.4e-7 (0.0000-NA)       | 3.48 (0.66-18.28)         | 2.75 (0.47-16.04)                   |
| Auto-immune diseases                  | 0.72 (0.32-1.62)         | 1.48 (0.44-5.01)          | 1.79 (0.29-10.89)                   |
| Malignancy                            | 0.79 (0.43-1.48)         | 0.96 (0.32-2.91)          | 0.79 (0.17-3.59)                    |
| <b>Total comorbidities</b>            |                          |                           |                                     |
| 0                                     | Reference                |                           |                                     |
| 1-2                                   | 1.10 (0.54-2.25)         | 0.94 (0.48-1.85)          | 1.29 (0.41-4.07)                    |
| >2                                    | 1.48 (0.49-4.47)         | 1.59 (0.41-6.16)          | 1.12 (0.17-7.32)                    |
| <b>Median Household income *</b>      |                          |                           |                                     |
| More than 20 <sup>th</sup> percentile | reference                |                           |                                     |
| Less than 20 <sup>th</sup> percentile | 2.50 (1.39-4.52) *       | 1.11 (0.74-1.66)          | 1.09 (0.53-2.24)                    |

\* Total population with median income = 4711. 20<sup>th</sup> percentile is \$53, 335.



**Supplementary Table 7.** Median household income by zip code and race and ethnic distribution of COVID-19 patients.

| Income category * | Total          |                 | White        |                | Latinx       |                | African American |                | Asian American |               | Others      |                |
|-------------------|----------------|-----------------|--------------|----------------|--------------|----------------|------------------|----------------|----------------|---------------|-------------|----------------|
|                   | Total (4703)** | Admitted (1389) | Total (2050) | Admitted (561) | Total (1277) | Admitted (457) | Total (673)      | Admitted (201) | Total (163)    | Admitted (48) | Total (540) | Admitted (131) |
| ≤25               | 17 (0.4%)      | 7 (0.5%)        | 4 (0.2%)     | 3 (0.5%)       | 11 (1%)      | 2 (0.4%)       | 1 (0.1%)         | 1 (0.5%)       | 0 (0%)         | 0 (0%)        | 1 (0.2%)    | 1 (1%)         |
| 25-50             | 536 (11%)      | 163 (12%)       | 100 (5%)     | 36 (6%)        | 226 (18%)    | 67 (15%)       | 137 (20%)        | 43 (21%)       | 19 (12%)       | 6 (13%)       | 54 (10%)    | 11 (8%)        |
| 50-75             | 2031 (43%)     | 708 (51%)       | 612 (30%)    | 212 (38%)      | 764 (60%)    | 299 (65%)      | 352 (52%)        | 101 (50%)      | 52 (32%)       | 20 (42%)      | 251 (46%)   | 76 (58%)       |
| 75-100            | 1088 (23%)     | 267 (19%)       | 595 (29%)    | 122 (22%)      | 226 (18%)    | 73 (16%)       | 106 (16%)        | 35 (17%)       | 40 (24.5%)     | 10 (21%)      | 121 (22%)   | 27 (21%)       |
| 100-125           | 649 (14%)      | 162 (12%)       | 455 (22%)    | 116 (21%)      | 41 (3%)      | 13 (3%)        | 55 (8%)          | 18 (9%)        | 19 (12%)       | 3 (6%)        | 79 (15%)    | 12 (9%)        |
| 125-150           | 188 (4%)       | 51 (4%)         | 135 (6.5%)   | 40 (7%)        | 4 (0.3%)     | 2 (0.4%)       | 18 (2.7%)        | 3 (1.5%)       | 12 (7%)        | 4 (8%)        | 19 (3.5%)   | 2 (1.5%)       |
| >150              | 194 (4%)       | 40 (3%)         | 149 (7.2%)   | 32 (6%)        | 5 (0.4%)     | 1 (0.2%)       | 4 (0.6%)         | 0 (0%)         | 21 (13%)       | 5 (10%)       | 15 (3%)     | 2 (1.5%)       |

\* Median income obtained by zip code-level census data and is presented in thousand dollars.

\*\* Median income data not available for 487 patients who were not from Massachusetts

**Supplementary Table 8.** Population density in square miles by zip code and race and ethnic distribution of COVID-19 patients.

|                           | <b>Total</b>                 |                        | <b>White</b>                 |                       | <b>Latinx</b>                |                       | <b>African American</b>     |                       |
|---------------------------|------------------------------|------------------------|------------------------------|-----------------------|------------------------------|-----------------------|-----------------------------|-----------------------|
| <b>Population density</b> | <b>Positive cases (4703)</b> | <b>Admitted (1389)</b> | <b>Positive cases (2050)</b> | <b>Admitted (561)</b> | <b>Positive cases (1277)</b> | <b>Admitted (457)</b> | <b>Positive cases (673)</b> | <b>Admitted (201)</b> |
| <b>&lt;=500</b>           | 122 (2.6%)                   | 26 (2%)                | 94 (4.5%)                    | 22 (4%)               | 7 (0.5%)                     | 0 (0%)                | 0 (0%)                      | 0 (0%)                |
| <b>500-1000</b>           | 267 (5.6%)                   | 50 (3%)                | 219 (10.6%)                  | 39 (7%)               | 5 (0.4%)                     | 1 (0.2%)              | 10 (1.4%)                   | 0 (0%)                |
| <b>1000-2500</b>          | 635 (13.5%)                  | 107 (8%)               | 429 (21%)                    | 76 (13.5%)            | 49 (4%)                      | 6 (1.3%)              | 55 (8%)                     | 14 (7%)               |
| <b>2500-5000</b>          | 656 (14%)                    | 164 (12%)              | 402 (19.6%)                  | 113 (20%)             | 87 (7%)                      | 25 (5.5%)             | 80 (12%)                    | 13 (6%)               |
| <b>5000-10000</b>         | 1200 (25.5%)                 | 443 (32%)              | 471 (23%)                    | 177 (31.5%)           | 392 (30.6%)                  | 158 (34.5%)           | 170 (25%)                   | 56 (28%)              |
| <b>&gt;10000</b>          | 1823 (39%)                   | 608 (44%)              | 435 (21%)                    | 134 (24%)             | 737 (58%)                    | 267 (58.4%)           | 358 (53%)                   | 118 (59%)             |

\*\* Median household and population density data not available for 479 patients who were not from Massachusetts

| <b>Supplementary Table 9. Characteristics of immunocompromised patients with COVID-19.</b> |                                      |                   |                        |                        |
|--------------------------------------------------------------------------------------------|--------------------------------------|-------------------|------------------------|------------------------|
| <b>Characteristics</b>                                                                     | <b>Solid organ transplant (N=22)</b> | <b>HIV (N=31)</b> | <b>Lymphoma (N=33)</b> | <b>Leukemia (N=25)</b> |
| <b>Median age (IQR)- years</b>                                                             | 56 (15.75)                           | 57 (13)           | 63 (23)                | 73 (19)                |
| <b>Male</b>                                                                                | 15 (68%)                             | 17 (55%)          | 16 (48%)               | 16 (64%)               |
| <b>Race</b>                                                                                |                                      |                   |                        |                        |
| White                                                                                      | 7 (32%)                              | 10 (32%)          | 22 (67%)               | 20 (80%)               |
| Latinx                                                                                     | 8 (36%)                              | 4 (13%)           | 6 (18%)                | 2 (8%)                 |
| African American                                                                           | 7 (32%)                              | 16 (52%)          | 3 (9%)                 | 2 (8%)                 |
| Others                                                                                     |                                      | 1 (3%)            | 2 (6%)                 | 1 (4%)                 |
| <b>Median time from transplant (months)</b>                                                | 36.5                                 | -                 | -                      | -                      |
| <b>Median last CD4+ T-cells (cells/mm<sup>3</sup>)</b>                                     | -                                    | 429               | -                      | -                      |
| <b>Hospitalized</b>                                                                        | 17 (77%)                             | 7 (23%)           | 8 (24%)                | 9 (36%)                |
| Required supplemental oxygen on admission                                                  | 9 (53%)                              | 6 (86%)           | 8 (100%)               | 9 (100%)               |
| <b>Outcome</b>                                                                             |                                      |                   |                        |                        |
| Discharged                                                                                 | 11 (65%)                             | 6 (86%)           | 3 (38%)                | 4 (44%)                |
| Death                                                                                      | 3 (18%)                              | 0 (0%)            | 3 (38%)                | 3 (33%)                |
| Still in hospital                                                                          | 4 (24%)                              | 1 (14%)           | 2 (25%)                | 2 (22%)                |
